# Supplementary material for: A molten globule-to-ordered structure transition of Drosophila melanogaster crammer is required for its ability to inhibit cathepsin
Source: PubMed Central journal article supplement — Biochem J. 2012 Feb 24;442(Pt 3):563–72. doi: 10.1042/BJ20111360 (PMC3286859; doi:10.1042/bj20111360), 2012-02-24
Supplement: bj4420563add.pdf [file bj4420563add.pdf]

## SUPPLEMENTARY ONLINE DATA

**A molten globule-to-ordered structure transition of *Drosophila melanogaster* crammer is required for its ability to inhibit cathepsin**Tien-Sheng TSENG<sup>\*1</sup>, Chao-Sheng CHENG<sup>\*1</sup>, Dian-Jiun CHEN<sup>\*</sup>, Min-Fang SHIH<sup>\*</sup>, Yu-Nan LIU<sup>\*</sup>, Shang-Te Danny HSU<sup>\*†2</sup> and Ping-Chiang LYU<sup>\*‡2</sup><sup>\*</sup>Institute of Bioinformatics and Structural Biology, National Tsing Hua University, Hsinchu, 30013, Taiwan, <sup>†</sup>Institute of Biological Chemistry, Academia Sinica, Taipei 115, Taiwan, and <sup>‡</sup>Graduate Institute of Molecular Systems Biomedicine, China Medical University, Taichung, 40402, Taiwan

## EXPERIMENTAL

**Expression and purification of *Drosophila* cathepsin B**

The *Drosophila* cathepsin B gene was amplified from cDNA libraries using the primers 5'-CGGATCCGACCCGA-TGAATCTATTGCTCCTG-3' (BamHI restriction site underlined) and 5'-GATCTCGAGTTACAGCTTGGGCAGACCCGCC-3' (XhoI restriction site underlined). The PCR amplification program was performed by 29 cycles of 30 s at 95°C, 30 s at 54°C and 1 min at 72°C. The PCR product was cloned into a pET-32a(+) vector (Novagen) to obtain a *Drosophila* cathepsin B construct containing a proregion and a mature protein. The sequence of the recombinant genes was verified by DNA sequencing (Mission Biotechnology).

*E. coli* BL21-Gold<sup>®</sup> (DE3) cells (Stratagene) harbouring a plasmid with the *Drosophila* cathepsin B gene were cultured in Luria–Bertani medium containing 50 mg/ml ampicillin at 37°C until the  $D_{600}$  value of the culture was 0.6. The protein was then expressed by adding IPTG (final concentration = 1 mM). Whole cells were then harvested by centrifugation at 4000 g for 20 min, and lysed by sonication. The lysates were centrifuged at 16000 g for 20 min at 4°C. The supernatant was removed and the precipitate was resuspended in 20 ml of 6 M guanidine buffer [50 mM Tris/HCl (pH 8.0), 150 mM NaCl, 5 mM EDTA, 10 mM DTT and 6 M GdnHCl (guanidinium chloride)]. The solution was then diluted into 1 litre of 50 mM Tris/HCl (pH 8.5), 150 mM NaCl, 5 mM EDTA, 10 mM reduced glutathione, 1 mM oxidized glutathione and 0.5 M arginine overnight. After refolding, the protein solution was concentrated and dialysed against 25 mM NaH<sub>2</sub>PO<sub>4</sub> (pH 7.0) and 0.5 M NaCl at 4°C. To autoproces cathepsin B, the protein solution was adjusted to pH 4.5 with acetic acid, and 5 mM EDTA and 5 mM DTT were added into a solution to incubate at 37°C for 1 h.

Proteins were purified by an AKTAprime system with a HiPrep<sup>®</sup> Sphacryl S-100 high-resolution gel-filtration column (Amersham Biosciences). The running buffer was 100 mM sodium acetate buffer (pH 5.0), containing 1 mM EDTA and 2 mM DTT. Each fraction was identified using Z-Phe-Arg-AMC substrate (Calbiochem) to confirm the cathepsin B activity.

<sup>1</sup> These authors contributed equally to this work

<sup>2</sup> Correspondence may be addressed to either of these authors (email lsipc@life.nthu.edu.tw or sthsu@gate.sinica.edu.tw). The structural co-ordinates reported will appear in the PDB under accession code 2L95.

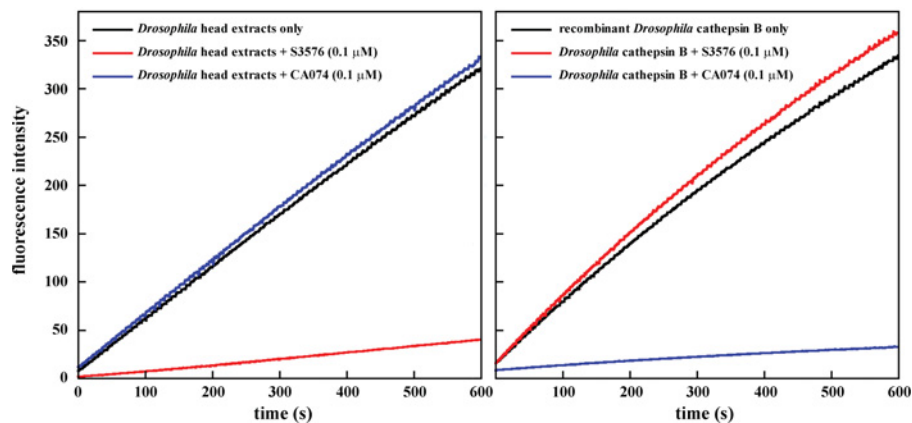

**Figure S1** Progress curves for the inhibition of cathepsins

To identify the active substance in our *Drosophila* head extract, we used cathepsin B/L-specific inhibitors. A cathepsin L-specific inhibitor (S3576, {tert-butyl-[(2S)-1-{2-[2-(2-ethylamino)-2-oxoethyl]sulfanylcarbonylhydrazinyl}-3-(1H-indol-3-yl)-1-oxopropan-2-yl]carbamate}) shows strong inhibition against the *Drosophila* head extract (left-hand panel). The same use of S3576 does not inhibit recombinant *Drosophila* cathepsin B (right-hand panel). In contrast, the cathepsin B-specific inhibitor (CA074, [L-3-*trans*-(propylcarbonyl)oxirane-2-carbonyl]-L-isoleucyl-L-proline) exhibits opposite results in the same assay. This indicates that the enzymatically active substance in the *Drosophila* head extract is mainly cathepsin L.

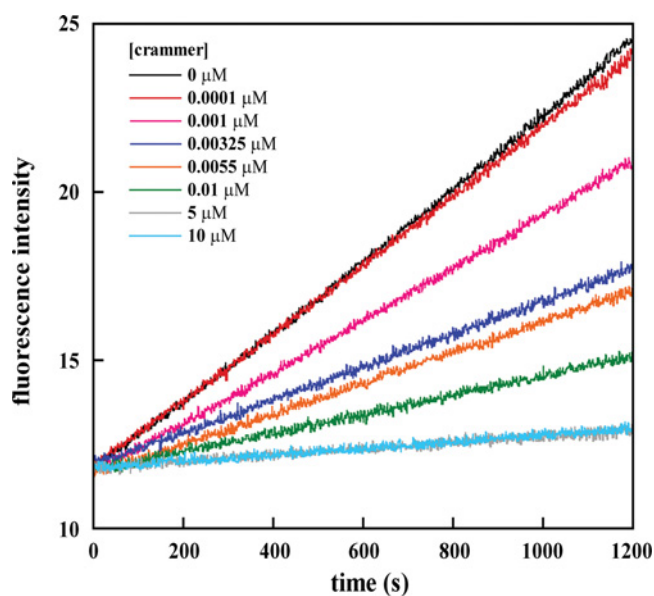

**Figure S2** Progress curves for the inhibition of cathepsin L by crammer

Progress curves for the inhibition of *Drosophila* cathepsin L in the presence of various concentrations of crammer gave linear plots, suggesting a concentration-dependent inhibition of initial velocity of product formation. The crammer concentrations are labelled in the Figure.

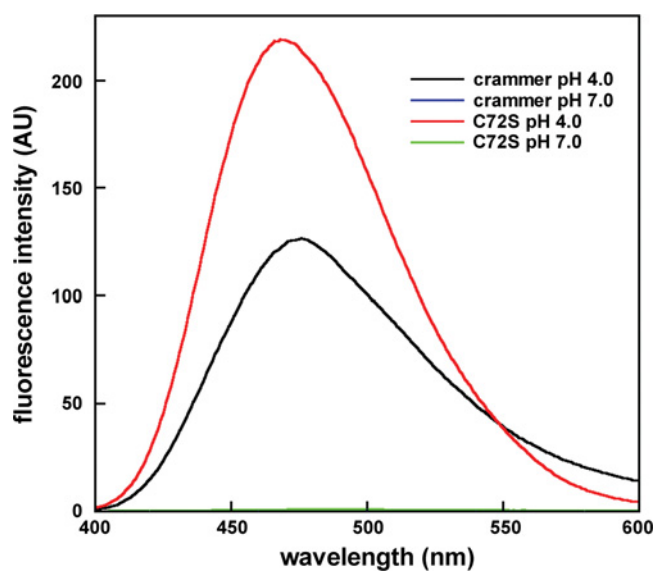

**Figure S3** ANS binding

The exposure of hydrophobic core was investigated by ANS fluorescence spectra. The ANS intensity was recorded from 400 to 600 nm ( $\lambda_{ex} = 365$  nm).

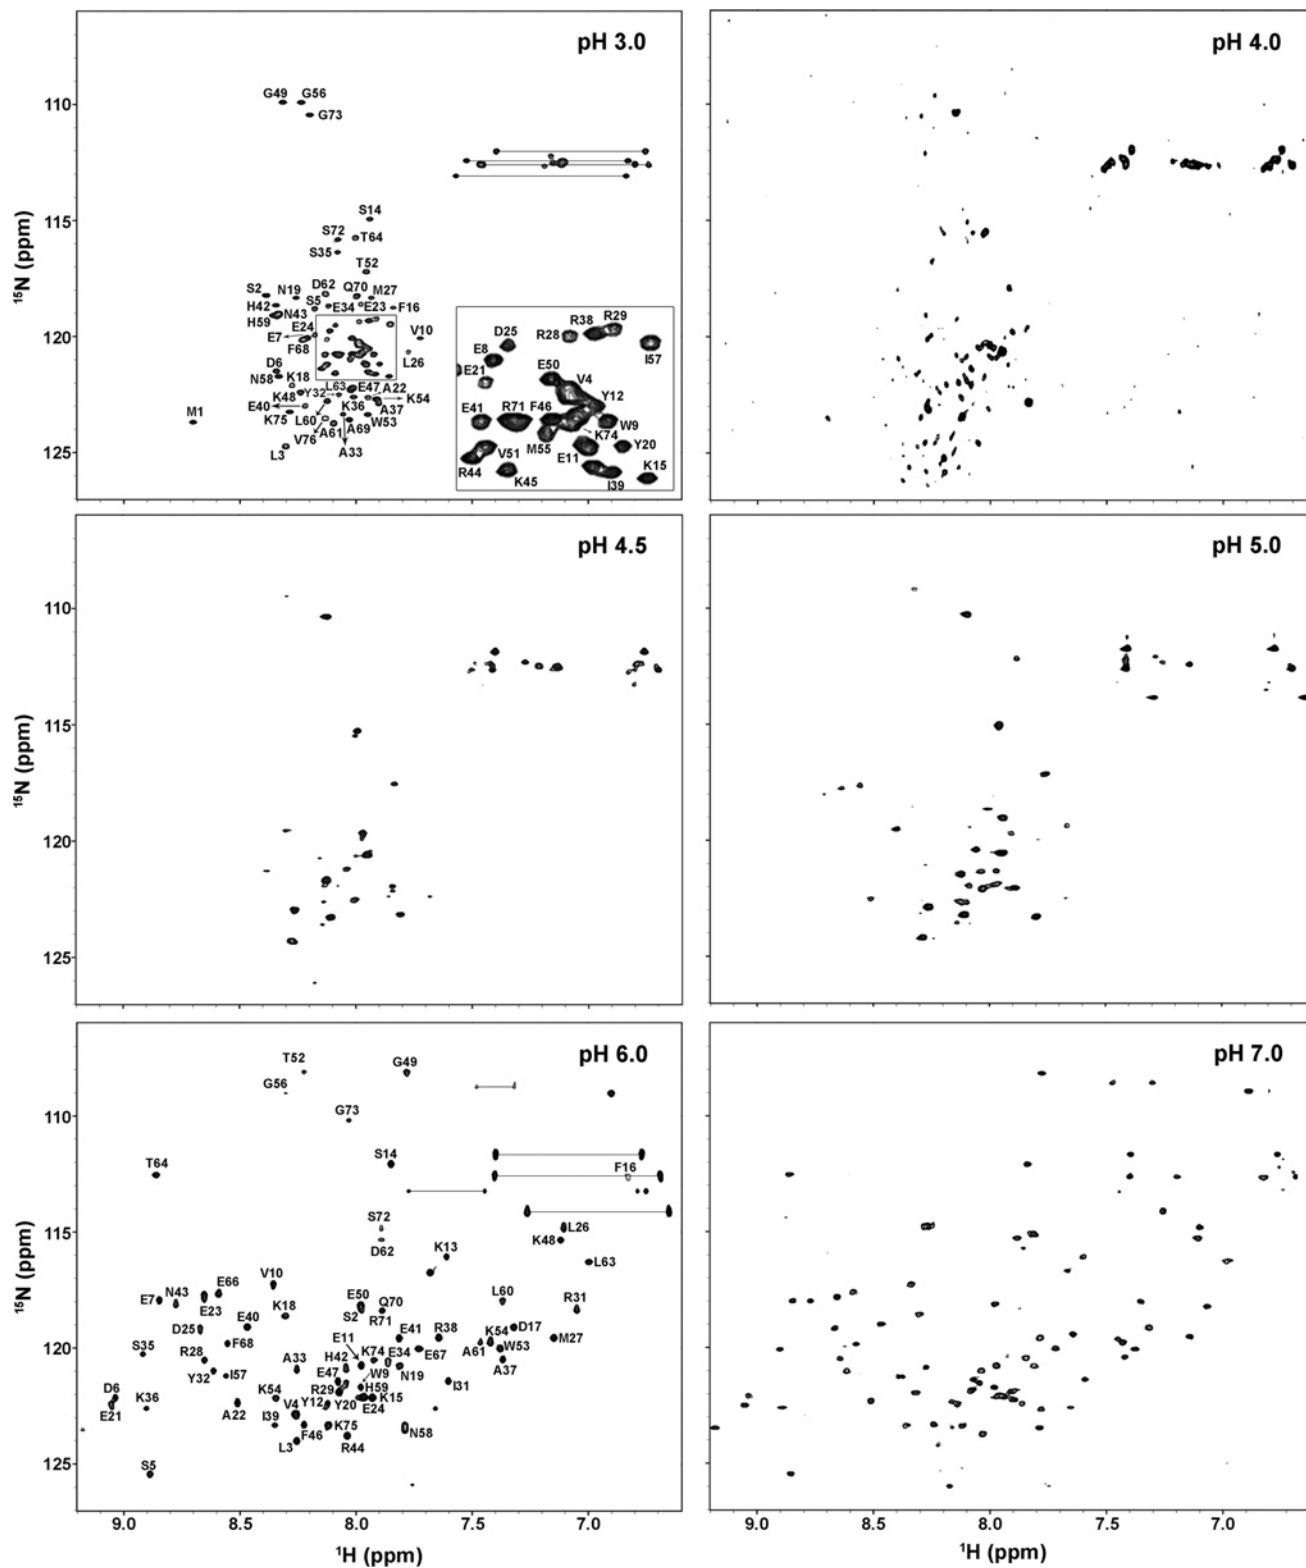

**Figure S4**  $^1\text{H}$ - $^{15}\text{N}$ -HSQC spectra of C72S as a function of pH

All spectra were recorded at 25 °C, and the assigned cross-peaks for crammer at pH 3.0 and pH 6.0 are labelled in the Figure. The insert in the upper-left-hand panel shows an expanded view of part of the spectrum.

Received 22 August 2011/29 November 2011; accepted 9 December 2011  
 Published as BJ Immediate Publication 9 December 2011, doi:10.1042/BJ20111360

© 2012 The Author(s)

The author(s) has paid for this article to be freely available under the terms of the Creative Commons Attribution Non-Commercial Licence (<http://creativecommons.org/licenses/by-nc/2.5/>) which permits unrestricted non-commercial use, distribution and reproduction in any medium, provided the original work is properly cited.
